# Supplementary material for: Development of a specific fluorescent probe to detect advanced glycation end products (AGEs)
Source: Royal Society of Chemistry journal article supplement (doi:10.1039/d4tb00590b), 2024-01-01
Supplement: d4tb00590b1.pdf [file d4tb00590b1.pdf]

## Development of a specific fluorescent probe to advanced-glycation end products (AGEs)

Heewon Cho<sup>a, †</sup>, Na-Kyeong Hong<sup>a, †</sup>, Insung Yong<sup>b</sup>, Haw-Young Kwon<sup>a</sup>, Nam-Young Kang<sup>c</sup>, Larissa Miasiro Ciaramicoli<sup>a</sup>, Pilnam Kim<sup>b</sup>, and Young-Tae Chang<sup>a,\*</sup>

<sup>a</sup> Department of Chemistry, Pohang University of Science and Technology (POSTECH), Pohang, Gyeongsangbuk-do, 37673, Republic of Korea.

<sup>b</sup> Department of Bio and Brain Engineering, Korea Advanced Institute of Science and Technology (KAIST), Daejeon, 34141, Republic of Korea.

<sup>c</sup> Department of Convergence IT Engineering, Pohang University of Science and Technology (POSTECH), Pohang, Gyeongsangbuk-do, 37673, Republic of Korea.

<sup>†</sup> These authors contributed equally to the work

\* Correspondence: ytchang@postech.ac.kr

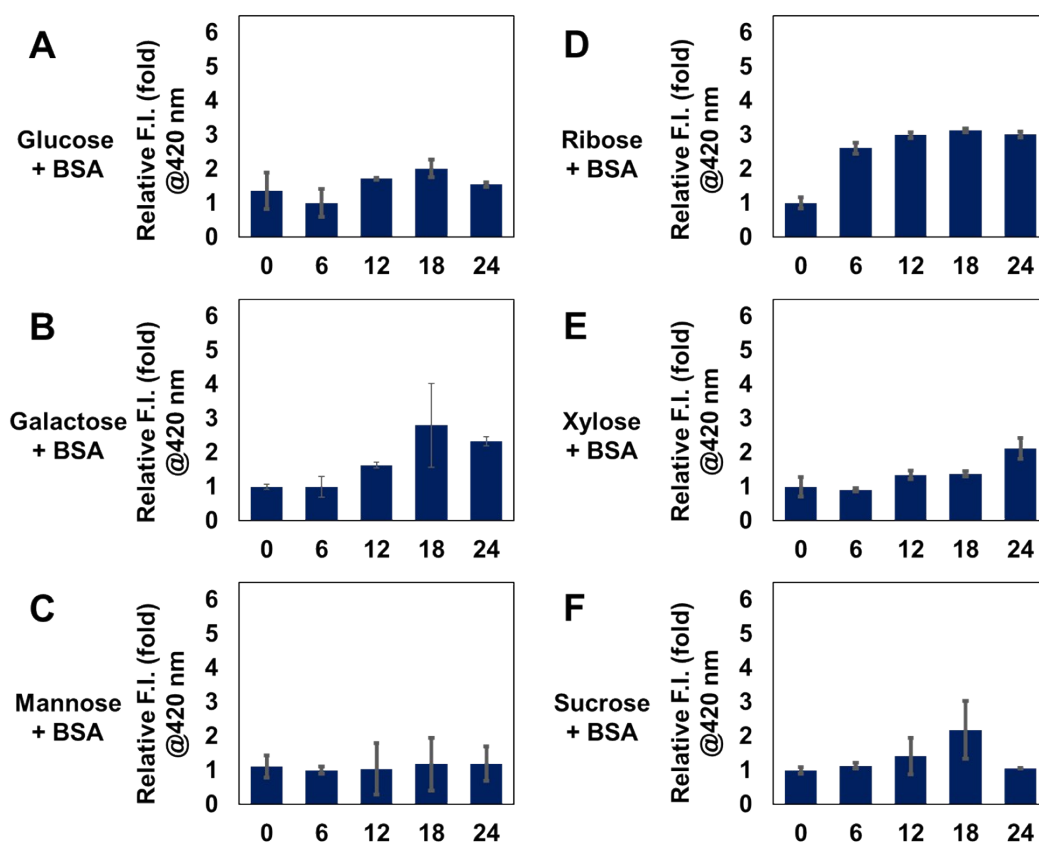

**Figure S1. Autofluorescence from carbohydrate type-dependent AGEs formation.** AGEs were formed by A) Glucose; B) Galactose; C) Mannose; D) Ribose; E) Xylose; and F) Sucrose along with BSA incubation until 24 days at intervals of 6 days. Autofluorescence was measured by the plate reader (ex: 370 nm, em: 420 nm)

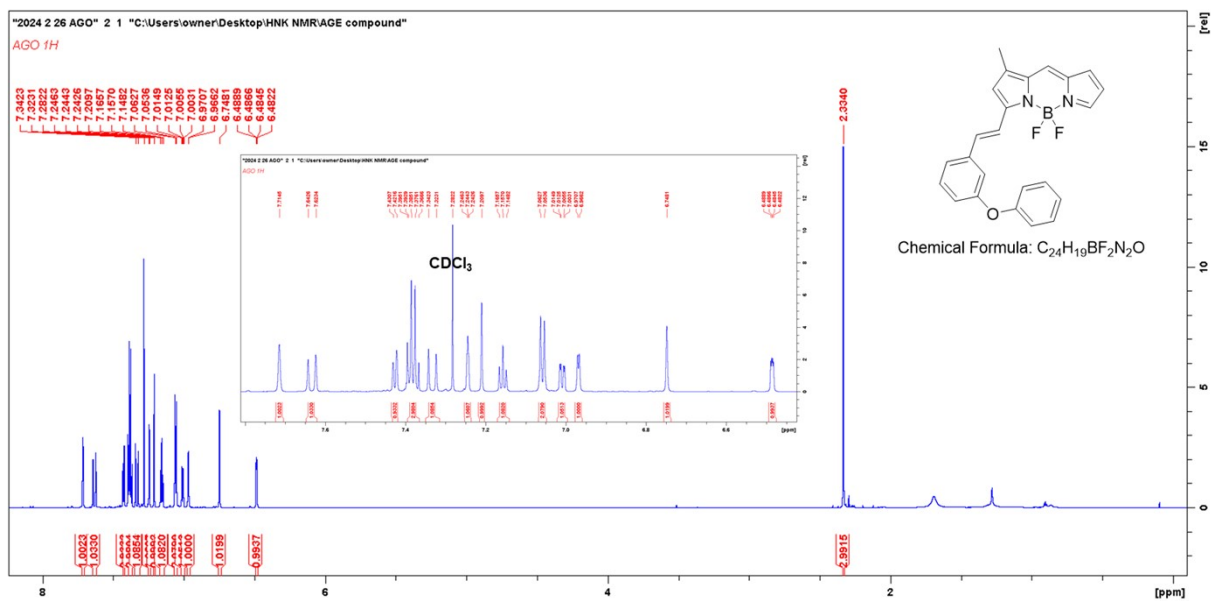

Figure S2.  $^1H$  NMR spectrum of AGO (850 MHz,  $CDCl_3$ ).

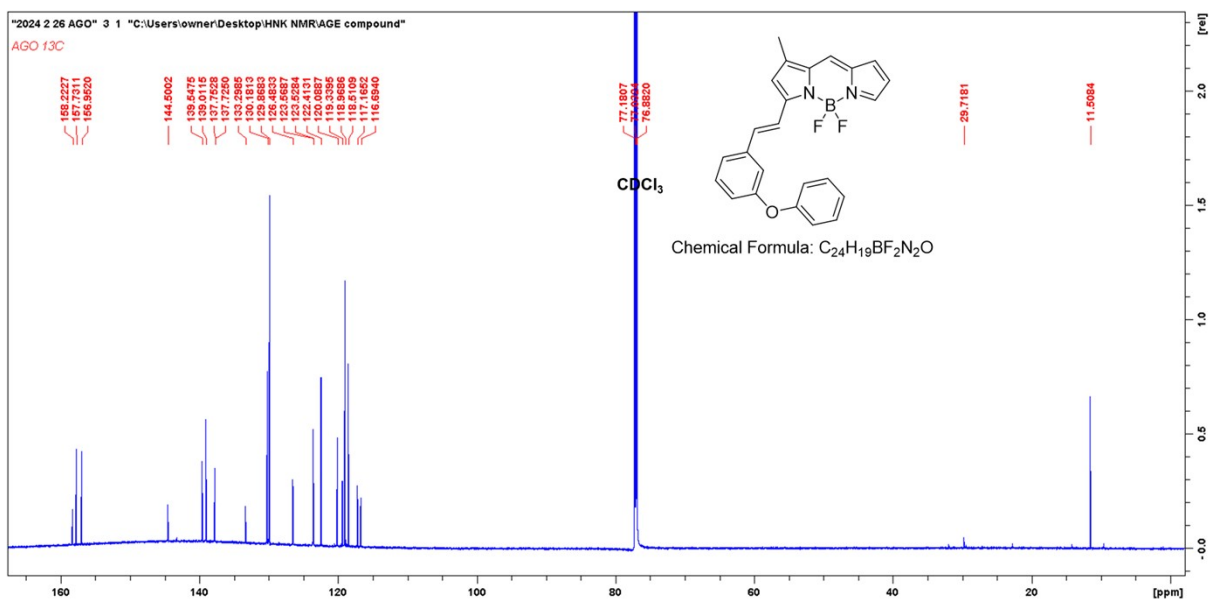

Figure S3.  $^{13}C$  NMR spectrum of AGO (214 MHz,  $CDCl_3$ ).

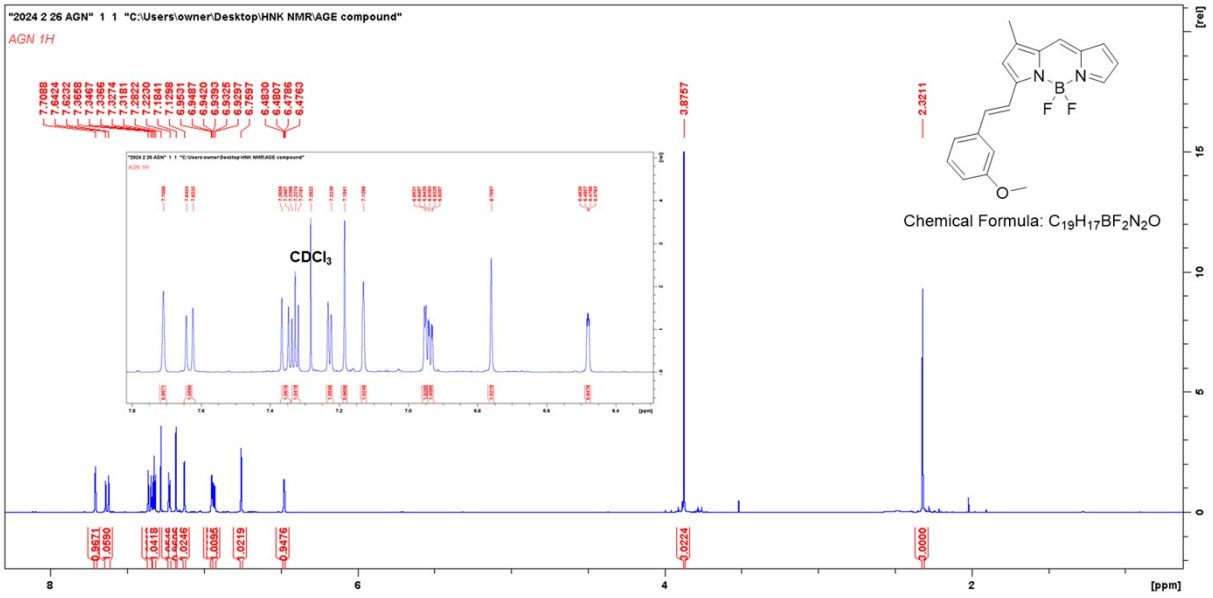

Figure S4. <sup>1</sup>H NMR spectrum of AGN (850 MHz, CDCl<sub>3</sub>).

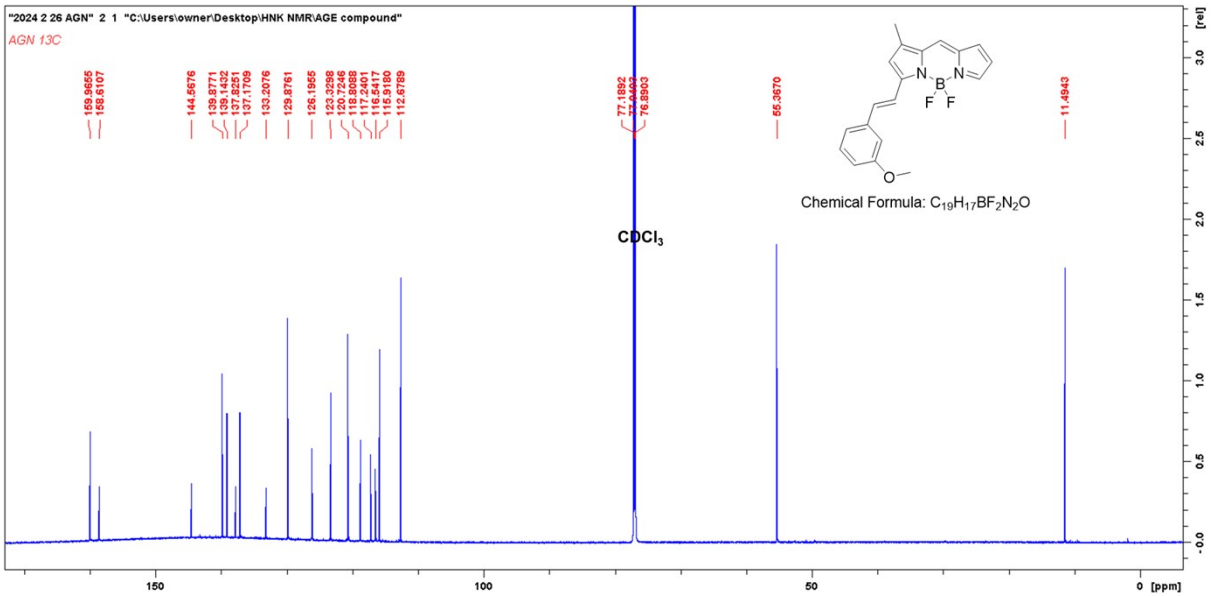

Figure S5. <sup>13</sup>C NMR spectrum of AGN (214 MHz, CDCl<sub>3</sub>).

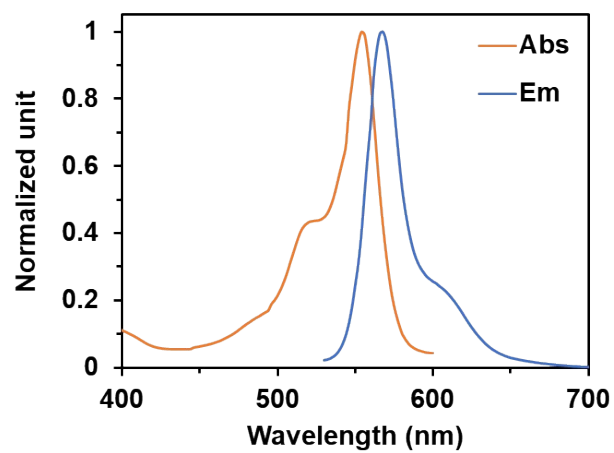

| $\lambda_{\text{abs}}$ (nm) | $\lambda_{\text{em}}$ (nm) | $\epsilon$ (cm <sup>-1</sup> M <sup>-1</sup> ) | $\Phi_{\text{fl}}$ |
|-----------------------------|----------------------------|------------------------------------------------|--------------------|
| 550                         | 672                        | 96950                                          | 0.86               |

Figure S6. Optical properties of AGO.
